# Supplementary material
Source: publisher site journal article supplement (https://www.dovepress.com/article/606760)
Supplement: Supplementary file 1 [file 606760%20Supplementary%20Materials.docx]

# **Supplementary data**

## Supplementary Table 1

*Overview of the five-week interdisciplinary intervention sessions, including weekly themes, nurse-led cognitive and educational components, and physiotherapist-led physical exercises.*

| **Week and themes** | **Social and cognitive nurse-led education** | **Progressive Physical Training** |
| --- | --- | --- |
| **Week 1)**  Head Trauma  – and Persistent Symptoms | - Brief introduction to the intervention, outlining its goal and what to expect in the upcoming weeks.  - Mindfulness exercises to improve present-moment awareness and psychological flexibility.29,43  - Education on head trauma, brain function, and the natural process of spontaneous recovery.  - **Introduction to the biopsychosocial model**, emphasizing the interaction between biological, psychological, and social factors in experiencing symptoms and recovery.26 | - Brief theoretical introduction on how physical exercise supports recovery in persistent PTH, emphasizing its effects on emotional health and functional improvement.  - **Guidance on safe and effective exercise** methods, tailored to individual symptom levels.  - Introduction to the principle of graded physical exercise: Pacing plan.47-49  - **Instruction and practice of individual exercises** aligned with the pacing method.  - Presentation of homework assignments, such as strength training programs, walking routines, and mindfulness practices. |
| **Week 2)**  Energy Management – How to Effectively Prioritize My Energy | - Mindfulness exercises  - Energy management: Focus on recognizing personal energy limits and applying practical strategies for sustainable daily functioning.  - The cognitive pyramid: A framework showing how higher-level cognitive functions (such as memory and planning) depend on basic processes like alertness and attention. It explains how fatigue or low energy can affect long-term cognitive performance.  - The spoon theory: A metaphor used to conceptualize limited energy availability. Helps with self-awareness and communicating invisible energy exhaustion or fatigue to others.40,41  - Homework: Have a discussion with family members about personal energy management needs. Complete reflective exercises to explore practical ways to conserve energy in daily routines. | - Warm up with 15 minutes of interval training or cycling.  - Controlled movement of the body’s joints.  - Individual exercises designed for gradual physical training  - Grounding techniques and targeted exercises to reduce dizziness and improve balance.  - Strength exercises emphasizing progressive resistance training to develop and sustain muscle strength.  - Continued a structured home program that incorporates pacing strategies, strength training, walking routines, and mindfulness practices. |
| **Week 3)**  Activity Regulation  – Boom-Bust, and Pacing Plan | - Introduce the concept of mindfulness as a practice of focused, non-judgmental awareness of the present moment, emphasizing the benefits of practicing regularly to enhance energy awareness and improve cognitive function over time.  - Introduction to the Boom-Bust cycle and gradual return to daily activities (pacing plan), emphasizing steady, manageable increases in effort to promote sustainable recovery.  - Discuss strategies for balancing activity and rest throughout the day. Emphasize the importance of pacing and prioritizing tasks to avoid overexertion and ensure steady progress.  - Homework: Creating a personalized pacing plan. | - Warm up with 15 minutes of interval training or cycling.  - Controlled movement of the body’s joints.  - Individual exercises designed for gradual physical training  - Grounding techniques and specific exercises aimed at reducing dizziness and improving coordination.  - Strength exercises emphasizing progressive resistance training to develop and sustain muscle strength.  - Continued a structured home program that incorporates pacing strategies, strength training, walking routines, and mindfulness practices. |
| **Week 4)**  How to Listen Less to My Inner Critic | - Mindfulness exercises  - Education and exercises focused on life values and acceptance, and their connection to headaches.  - Introduce the bus metaphor to clarify and highlight personal values.  - Homework related to the bus metaphor and ongoing work on the pacing plan. | - Warm up with 15 minutes of interval training or cycling.  - Full-body movements and stretching.  - Ongoing exercises for balance and dizziness.  - Strength exercises with resistance bands, supplemented by a personalized strength program.  - New physical tasks are gradually introduced in accordance with pacing principles after successfully achieving earlier goals.  - Continued a structured home program that incorporates pacing strategies, strength training, walking routines, and mindfulness practices. |
| **Week 5)**  Summary of the Program and Future Plans | - Mindfulness exercises  - Discussion on how energy management strategies are affecting daily functioning and quality of life currently.  - Develop a future personalized plan for ongoing energy management, including strategies to maintain balance and prevent setbacks.  - Discuss readiness for returning to work or increasing responsibilities, emphasizing sustainable pacing and gradual reintegration. | - Warm up with 15 minutes of interval training or cycling.  - Full-body movements and stretching.  - Strength exercises with resistance bands, supplemented by a personalized strength program.  - Summarize the main components covered over the past five weeks, along with the reasoning behind each element (e.g., pacing, physical conditioning, mindfulness).  - Preparing for the independent continuation of learned strategies.  - Conduct one-on-one discussions to outline plans based on individual goals related to the pacing plan, physical training, and mindfulness practice. |

## Supplementary File 1

*Recruitment poster*


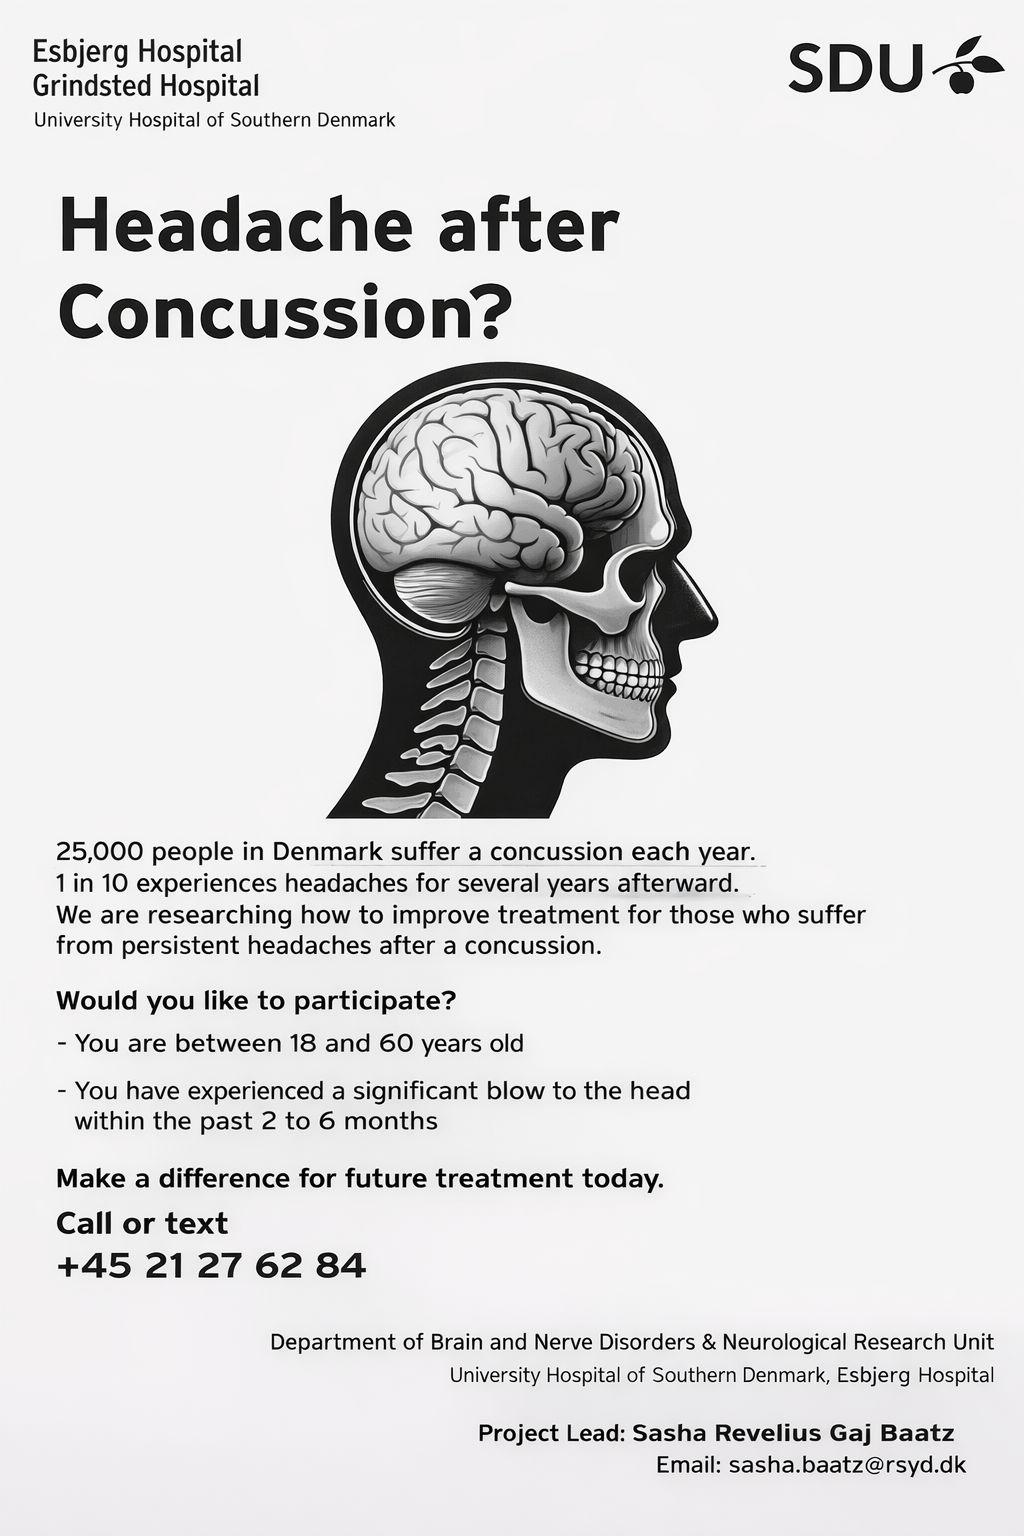
Nederst på formularen
